# Supplementary material for: Transcriptome landscape of Rafflesia cantleyi floral buds reveals insights into the roles of transcription factors and phytohormones in flower development
Source: PubMed Central journal article supplement (PMC6919626; doi:10.1371/journal.pone.0226338), 2019-12-18
Supplement: pone.0226338.s001.pdf [file pone.0226338.s001.pdf]

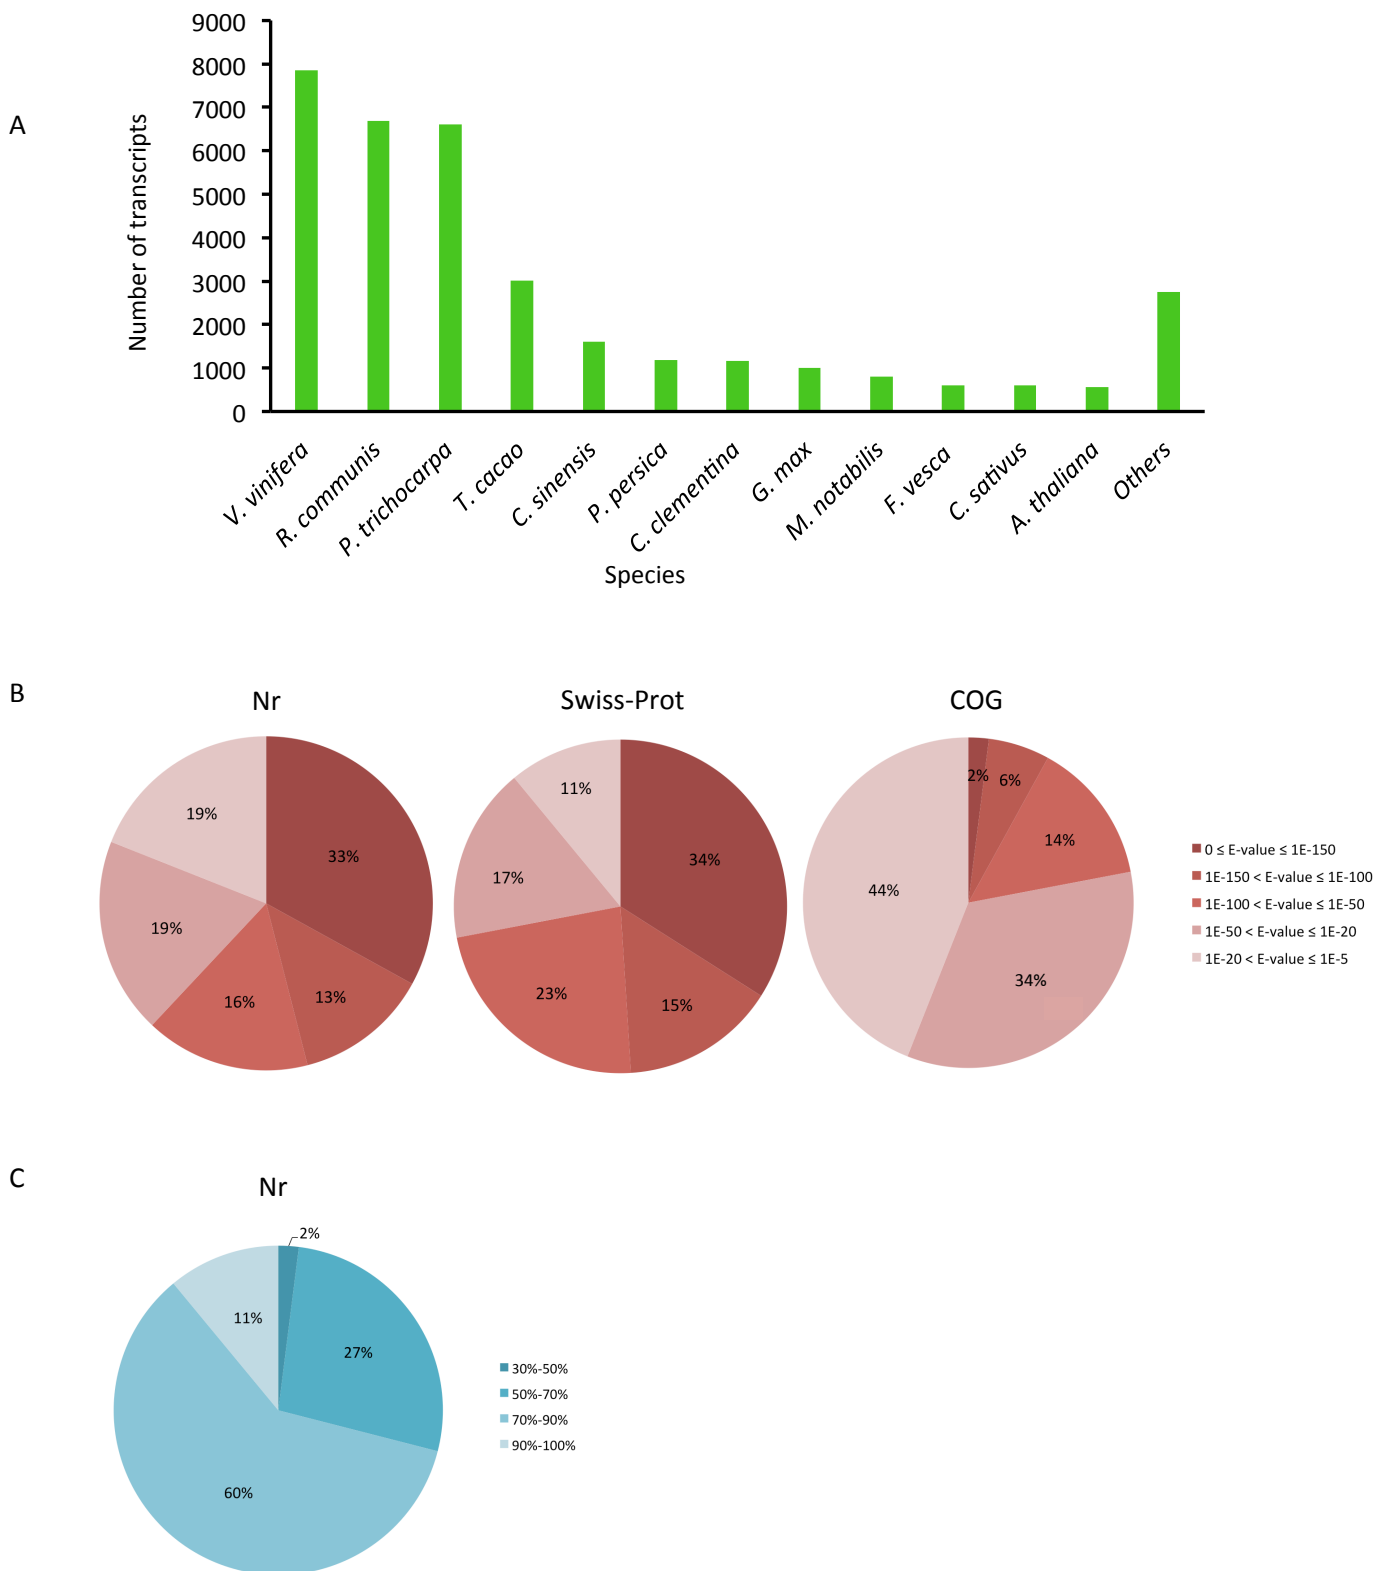

Figure S1. Annotation of *Rafflesia cantleyi* transcripts. (A) Identification of the transcripts of other plant species homologous to the annotated *R. cantleyi* transcripts. (B) Distribution of E-values of BLASTX hits from Nr, Swiss-Prot, and COG database. (C) Distribution of similarity values of top Nr BLASTX hits.
