# Supplementary material for: Transcriptome landscape of Rafflesia cantleyi floral buds reveals insights into the roles of transcription factors and phytohormones in flower development
Source: PubMed Central journal article supplement (PMC6919626; doi:10.1371/journal.pone.0226338), 2019-12-18
Supplement: pone.0226338.s002.pdf [file pone.0226338.s002.pdf]

## Cell cycle control, cell division

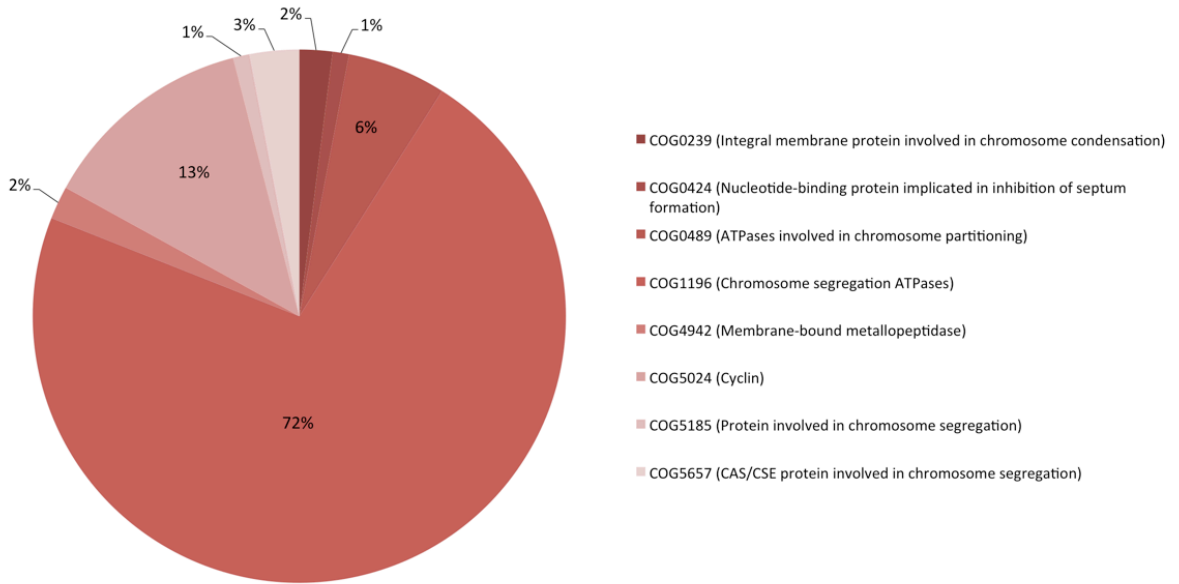

## Signal transduction mechanisms

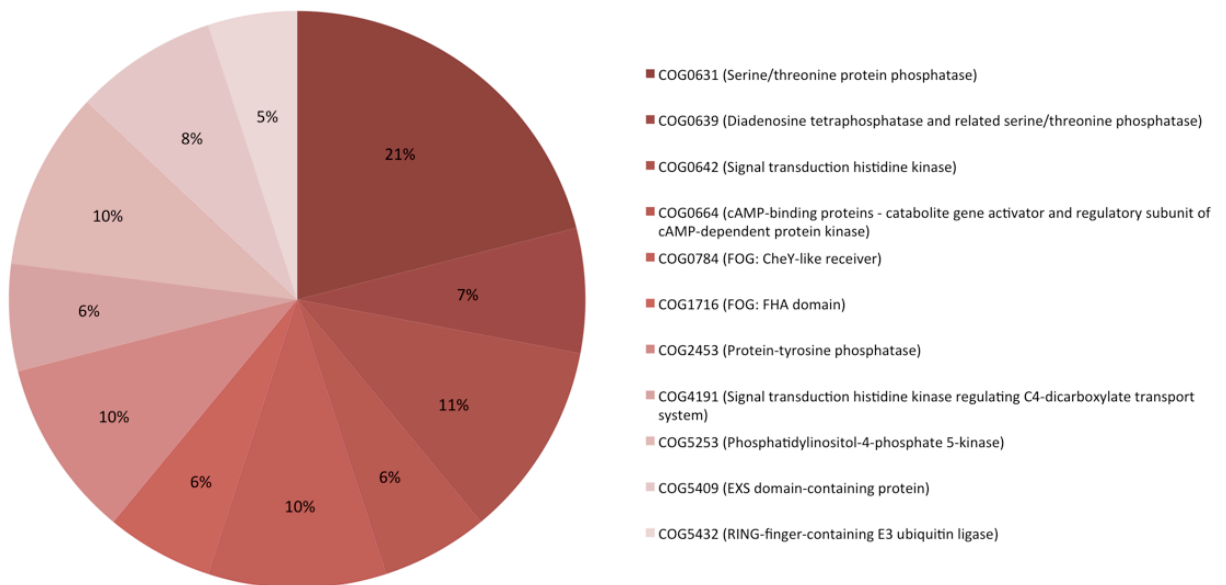

Figure S2. Percentage of second level COG terms of *Rafflesia cantleyi* transcriptome. (A) 'Cell cycle control, cell division'. (B) 'Signal transduction mechanisms'.
