# Supplementary material for: Transcriptome landscape of Rafflesia cantleyi floral buds reveals insights into the roles of transcription factors and phytohormones in flower development
Source: PubMed Central journal article supplement (PMC6919626; doi:10.1371/journal.pone.0226338), 2019-12-18
Supplement: pone.0226338.s005.pdf [file pone.0226338.s005.pdf]

S1 Table. Primer sequences of reference genes and 12 selected genes for RT-qPCR analysis

| <b>Gene</b> | <b>Forward primer 5' → 3'</b> | <b>Reverse primer 5' → 3'</b> |
|-------------|-------------------------------|-------------------------------|
| GAPDH       | TGGCAAGAGGAGCAAGACAAT         | GAAGGGTGGTGCCAAAAAGG          |
| UBQ5        | TTCTCCTCTACCCGTTCTTG          | TGTTGAGGCTTAGGGGAGGAA         |
| FUL         | TGCCTGCTTATCTTGTTCTCG         | TCGCCCCCTCACCCATAAAT          |
| AP2         | ACGAGAGAGGGAGATGATGTG         | GCCTGCCCTGTGCTGTATT           |
| LFY         | CGAGCACCCAGTACCCTTCT          | GTTGGTTGGGGGTTGAGGA           |
| AP3         | TCTATCTTGCCCCGTCCA            | TTCCTGAAAGCTCCTCGTGT          |
| SEP1        | ACCTGCCAAAGAAGACTAGAGA        | CAATTCCTTAGTGTTCAAAGGGC       |
| SVP         | TCTGTGATCGCTTGTTTCACC         | CCTTCTCTCTCGCCATCACC          |
| UFO         | AACAAGGGGCAACAAGCATT          | AATATGAGGGAGCAGTCGGT          |
| FCA         | GCTGTACTTGTTGCTGCTGTT         | TGTAACTGGACAGAGCATACTC        |
| EMF2        | TTCGACGTGGTTTTGCTCGT          | GGGAAACTGGAGGAACAGCC          |
| PIN1        | GACTAGAGCGATGGGCAAGG          | GGCGATGAGATTCCTTACGGG         |
| GA2OX8      | AACGAAGACCCACAGGACATC         | CCTTCAATACGTCGCTGGAAA         |
| CKX7        | TGCTCGCACAAAGTAGAGTCG         | TACGCAATCATGTGCGCAGTG         |
