# Supplementary material for: Transcriptome landscape of Rafflesia cantleyi floral buds reveals insights into the roles of transcription factors and phytohormones in flower development
Source: PubMed Central journal article supplement (PMC6919626; doi:10.1371/journal.pone.0226338), 2019-12-18
Supplement: pone.0226338.s006.pdf [file pone.0226338.s006.pdf]

S2 Table. Functional annotation of *Rafflesia cantleyi* transcripts against Nr, Swiss-Prot, TAIR, PFAM, GO, COG and KEGG databases

| <b>Database</b> | <b>Number of annotated transcripts</b> | <b>Percentage (%)</b> |
|-----------------|----------------------------------------|-----------------------|
| Nr              | 31,444                                 | 35.0                  |
| Swiss-Prot      | 21,781                                 | 24.3                  |
| TAIR            | 25,970                                 | 28.9                  |
| PFAM-TMHMM      | 5,069                                  | 5.6                   |
| GO              | 28,922                                 | 32.3                  |
| COG             | 7,172                                  | 7.9                   |
| KEGG            | 5,850                                  | 6.5                   |
