# Supplementary material for: Transcriptome landscape of Rafflesia cantleyi floral buds reveals insights into the roles of transcription factors and phytohormones in flower development
Source: PubMed Central journal article supplement (PMC6919626; doi:10.1371/journal.pone.0226338), 2019-12-18
Supplement: pone.0226338.s007.pdf [file pone.0226338.s007.pdf]

S3 Table. GO classifications of transcripts

| <b>Ontology</b>    | <b>Class</b>                                       | <b>Number of transcripts</b> |
|--------------------|----------------------------------------------------|------------------------------|
| Biological process | Metabolic process                                  | 16950                        |
| Biological process | Cellular process                                   | 16346                        |
| Biological process | Single-organism process                            | 11855                        |
| Biological process | Biological regulation                              | 5762                         |
| Biological process | Response to stimulus                               | 5515                         |
| Biological process | Cellular component organization or biogenesis      | 5221                         |
| Biological process | Regulation of biological process                   | 5095                         |
| Biological process | Localization                                       | 3732                         |
| Biological process | Developmental process                              | 3668                         |
| Biological process | Multicellular organismal process                   | 3404                         |
| Biological process | Reproduction                                       | 2596                         |
| Biological process | Reproductive process                               | 2432                         |
| Biological process | Multi-organism process                             | 1443                         |
| Biological process | Signaling                                          | 1370                         |
| Biological process | Negative regulation of biological process          | 1349                         |
| Biological process | Positive regulation of biological process          | 1065                         |
| Biological process | Growth                                             | 853                          |
| Biological process | Immune system process                              | 555                          |
| Biological process | Biological adhesion                                | 140                          |
| Biological process | Rhythmic process                                   | 78                           |
| Cellular component | Cell                                               | 15385                        |
| Cellular component | Cell part                                          | 15345                        |
| Cellular component | Organelle                                          | 12145                        |
| Cellular component | Membrane                                           | 6977                         |
| Cellular component | Organelle part                                     | 4853                         |
| Cellular component | Macromolecular complex                             | 4773                         |
| Cellular component | Membrane part                                      | 4321                         |
| Cellular component | Membrane-enclosed lumen                            | 1447                         |
| Cellular component | Extracellular region                               | 687                          |
| Cellular component | Cell junction                                      | 624                          |
| Cellular component | Symplast                                           | 623                          |
| Cellular component | Supramolecular complex                             | 268                          |
| Cellular component | Virion                                             | 91                           |
| Cellular component | Virion part                                        | 88                           |
| Molecular function | Binding                                            | 14992                        |
| Molecular function | Catalytic activity                                 | 12510                        |
| Molecular function | Transporter activity                               | 1540                         |
| Molecular function | Structural molecule activity                       | 574                          |
| Molecular function | Nucleic acid binding transcription factor activity | 564                          |

---

|                    |                                                |     |
|--------------------|------------------------------------------------|-----|
| Molecular function | Molecular function regulator                   | 293 |
| Molecular function | Signal transducer activity                     | 239 |
| Molecular function | Antioxidant activity                           | 120 |
| Molecular function | Electron carrier activity                      | 111 |
| Molecular function | Transcription factor activity, protein binding | 102 |
| Molecular function | Molecular transducer activity                  | 101 |
| Molecular function | Nutrient reservoir activity                    | 24  |

---
