# Supplementary material for: Transcriptome landscape of Rafflesia cantleyi floral buds reveals insights into the roles of transcription factors and phytohormones in flower development
Source: PubMed Central journal article supplement (PMC6919626; doi:10.1371/journal.pone.0226338), 2019-12-18
Supplement: pone.0226338.s008.pdf [file pone.0226338.s008.pdf]

S4 Table. KEGG classifications of transcripts

| <b>KEGG category</b> | <b>KEGG pathway</b>                                 | <b>Pathway ID</b> | <b>Count</b> |
|----------------------|-----------------------------------------------------|-------------------|--------------|
| Metabolism           | Purine metabolism                                   | ko00230           | 3488         |
| Metabolism           | Thiamine metabolism                                 | ko00730           | 1865         |
| Metabolism           | Biosynthesis of antibiotics                         | ko01130           | 960          |
| Metabolism           | Pyrimidine metabolism                               | ko00240           | 411          |
| Metabolism           | Aminobenzoate degradation                           | ko00627           | 372          |
| Metabolism           | Drug metabolism - other enzymes                     | ko00983           | 328          |
| Metabolism           | Starch and sucrose metabolism                       | ko00500           | 300          |
| Metabolism           | Inositol phosphate metabolism                       | ko00562           | 291          |
| Metabolism           | Other glycan degradation                            | ko00511           | 284          |
| Metabolism           | Oxidative phosphorylation                           | ko00190           | 230          |
| Metabolism           | Glycolysis / Gluconeogenesis                        | ko00010           | 219          |
| Metabolism           | Glycerophospholipid metabolism                      | ko00564           | 212          |
| Metabolism           | Alanine, aspartate and glutamate metabolism         | ko00250           | 207          |
| Metabolism           | Amino sugar and nucleotide sugar metabolism         | ko00520           | 200          |
| Metabolism           | Pentose and glucuronate interconversions            | ko00040           | 195          |
| Metabolism           | Pyruvate metabolism                                 | ko00620           | 192          |
| Metabolism           | Arginine biosynthesis                               | ko00220           | 191          |
| Metabolism           | Galactose metabolism                                | ko00052           | 178          |
| Metabolism           | Phenylpropanoid biosynthesis                        | ko00940           | 178          |
| Metabolism           | Cysteine and methionine metabolism                  | ko00270           | 173          |
| Metabolism           | Phenylalanine, tyrosine and tryptophan biosynthesis | ko00400           | 165          |
| Metabolism           | Glycerolipid metabolism                             | ko00561           | 157          |
| Metabolism           | Lysine degradation                                  | ko00310           | 150          |
| Metabolism           | Fatty acid degradation                              | ko00071           | 147          |
| Metabolism           | Glycine, serine and threonine metabolism            | ko00260           | 147          |
| Metabolism           | Arginine and proline metabolism                     | ko00330           | 143          |

---

|            |                                             |         |     |
|------------|---------------------------------------------|---------|-----|
| Metabolism | Phenylalanine metabolism                    | ko00360 | 134 |
| Metabolism | Fructose and mannose metabolism             | ko00051 | 131 |
| Metabolism | beta-Alanine metabolism                     | ko00410 | 122 |
| Metabolism | Methane metabolism                          | ko00680 | 116 |
| Metabolism | Fatty acid biosynthesis                     | ko00061 | 115 |
| Metabolism | Valine, leucine and isoleucine degradation  | ko00280 | 114 |
| Metabolism | Propanoate metabolism                       | ko00640 | 112 |
| Metabolism | Folate biosynthesis                         | ko00790 | 110 |
| Metabolism | Alpha-linolenic acid metabolism             | ko00592 | 109 |
| Metabolism | Tyrosine metabolism                         | ko00350 | 108 |
| Metabolism | Carbon fixation in photosynthetic organisms | ko00710 | 107 |
| Metabolism | Nitrogen metabolism                         | ko00910 | 106 |
| Metabolism | Carbon fixation pathways in prokaryotes     | ko00720 | 103 |
| Metabolism | Nicotinate and nicotinamide metabolism      | ko00760 | 102 |
| Metabolism | Tryptophan metabolism                       | ko00380 | 100 |
| Metabolism | Ascorbate and aldarate metabolism           | ko00053 | 96  |
| Metabolism | Porphyrin and chlorophyll metabolism        | ko00860 | 94  |
| Metabolism | Glyoxylate and dicarboxylate metabolism     | ko00630 | 86  |
| Metabolism | Pentose phosphate pathway                   | ko00030 | 85  |
| Metabolism | Sulfur metabolism                           | ko00920 | 83  |
| Metabolism | Isoquinoline alkaloid biosynthesis          | ko00950 | 80  |
| Metabolism | Biosynthesis of unsaturated fatty acids     | ko01040 | 78  |
| Metabolism | Sphingolipid metabolism                     | ko00600 | 78  |
| Metabolism | Drug metabolism - cytochrome P450           | ko00982 | 77  |
| Metabolism | Ether lipid metabolism                      | ko00565 | 75  |
| Metabolism | Terpenoid backbone biosynthesis             | ko00900 | 71  |
| Metabolism | Butanoate metabolism                        | ko00650 | 70  |
| Metabolism | Histidine metabolism                        | ko00340 | 68  |
| Metabolism | Glutathione metabolism                      | ko00480 | 66  |

---

---

|            |                                                        |         |    |
|------------|--------------------------------------------------------|---------|----|
| Metabolism | Tropane, piperidine and pyridine alkaloid biosynthesis | ko00960 | 66 |
| Metabolism | Lysine biosynthesis                                    | ko00300 | 64 |
| Metabolism | Limonene and pinene degradation                        | ko00903 | 60 |
| Metabolism | Pantothenate and CoA biosynthesis                      | ko00770 | 60 |
| Metabolism | Metabolism of xenobiotics by cytochrome P450           | ko00980 | 59 |
| Metabolism | Glycosaminoglycan biosynthesis - HS/Hep                | ko00534 | 58 |
| Metabolism | Flavonoid biosynthesis                                 | ko00941 | 54 |
| Metabolism | N-Glycan biosynthesis                                  | ko00510 | 54 |
| Metabolism | One carbon pool by folate                              | ko00670 | 54 |
| Metabolism | Retinol metabolism                                     | ko00830 | 54 |
| Metabolism | Fatty acid elongation                                  | ko00062 | 53 |
| Metabolism | Glycosaminoglycan biosynthesis - CS/DS                 | ko00532 | 52 |
| Metabolism | D-Glutamine and D-glutamate metabolism                 | ko00471 | 50 |
| Metabolism | Steroid hormone biosynthesis                           | ko00140 | 50 |
| Metabolism | Cyanoamino acid metabolism                             | ko00460 | 49 |
| Metabolism | Monobactam biosynthesis                                | ko00261 | 47 |
| Metabolism | Various types of N-glycan biosynthesis                 | ko00513 | 45 |
| Metabolism | Caprolactam degradation                                | ko00930 | 44 |
| Metabolism | Riboflavin metabolism                                  | ko00740 | 44 |
| Metabolism | Citrate cycle (TCA cycle)                              | ko00020 | 43 |
| Metabolism | Linoleic acid metabolism                               | ko00591 | 43 |
| Metabolism | Benzoate degradation                                   | ko00362 | 42 |
| Metabolism | Chloroalkane and chloroalkene degradation              | ko00625 | 40 |
| Metabolism | Novobiocin biosynthesis                                | ko00401 | 40 |
| Metabolism | Selenocompound metabolism                              | ko00450 | 39 |
| Metabolism | Geraniol degradation                                   | ko00281 | 38 |
| Metabolism | Arachidonic acid metabolism                            | ko00590 | 36 |
| Metabolism | Glycosaminoglycan degradation                          | ko00531 | 36 |
| Metabolism | Glycosphingolipid biosynthesis - ganglio series        | ko00604 | 36 |

---

|            |                                                            |         |    |
|------------|------------------------------------------------------------|---------|----|
| Metabolism | Streptomycin biosynthesis                                  | ko00521 | 34 |
| Metabolism | Valine, leucine and isoleucine biosynthesis                | ko00290 | 34 |
| Metabolism | Biotin metabolism                                          | ko00780 | 33 |
| Metabolism | Ubiquinone and other terpenoid-quinone biosynthesis        | ko00130 | 31 |
| Metabolism | Insect hormone biosynthesis                                | ko00981 | 30 |
| Metabolism | Carbapenem biosynthesis                                    | ko00332 | 26 |
| Metabolism | Steroid biosynthesis                                       | ko00100 | 26 |
| Metabolism | Phosphonate and phosphinate metabolism                     | ko00440 | 25 |
| Metabolism | C5-branched dibasic acid metabolism                        | ko00660 | 23 |
| Metabolism | Cutin, suberine and wax biosynthesis                       | ko00073 | 21 |
| Metabolism | Glycosylphosphatidylinositol (GPI)-anchor biosynthesis     | ko00563 | 21 |
| Metabolism | Diterpenoid biosynthesis                                   | ko00904 | 20 |
| Metabolism | Neomycin, kanamycin and gentamicin biosynthesis            | ko00524 | 20 |
| Metabolism | Taurine and hypotaurine metabolism                         | ko00430 | 17 |
| Metabolism | Caffeine metabolism                                        | ko00232 | 16 |
| Metabolism | Flavone and flavonol biosynthesis                          | ko00944 | 16 |
| Metabolism | Glycosphingolipid biosynthesis - globo and isoglobo series | ko00603 | 16 |
| Metabolism | Atrazine degradation                                       | ko00791 | 14 |
| Metabolism | Lipopolysaccharide biosynthesis                            | ko00540 | 12 |
| Metabolism | Vitamin B6 metabolism                                      | ko00750 | 12 |
| Metabolism | Mannose type O-glycan biosynthesis                         | ko00515 | 11 |
| Metabolism | Steroid degradation                                        | ko00984 | 11 |
| Metabolism | Zeatin biosynthesis                                        | ko00908 | 11 |
| Metabolism | Naphthalene degradation                                    | ko00626 | 10 |
| Metabolism | Ethylbenzene degradation                                   | ko00642 | 7  |
| Metabolism | Styrene degradation                                        | ko00643 | 7  |
| Metabolism | Aflatoxin biosynthesis                                     | ko00254 | 6  |

|                    |                                                            |         |     |
|--------------------|------------------------------------------------------------|---------|-----|
| Metabolism         | Betalain biosynthesis                                      | ko00965 | 5   |
| Metabolism         | Photosynthesis                                             | ko00195 | 5   |
| Metabolism         | Stilbenoid, diarylheptanoid and gingerol biosynthesis      | ko00945 | 5   |
| Metabolism         | Glucosinolate biosynthesis                                 | ko00966 | 4   |
| Metabolism         | Indole alkaloid biosynthesis                               | ko00901 | 4   |
| Metabolism         | Synthesis and degradation of ketone bodies                 | ko00072 | 4   |
| Metabolism         | Anthocyanin biosynthesis                                   | ko00942 | 3   |
| Metabolism         | Monoterpenoid biosynthesis                                 | ko00902 | 3   |
| Metabolism         | Penicillin and cephalosporin biosynthesis                  | ko00311 | 3   |
| Metabolism         | Primary bile acid biosynthesis                             | ko00120 | 3   |
| Metabolism         | Sesquiterpenoid and triterpenoid biosynthesis              | ko00909 | 3   |
| Metabolism         | Acarbose and validamycin biosynthesis                      | ko00525 | 2   |
| Metabolism         | Biosynthesis of ansamycins                                 | ko01051 | 2   |
| Metabolism         | Biosynthesis of vancomycin group antibiotics               | ko01055 | 2   |
| Metabolism         | Chlorocyclohexane and chlorobenzene degradation            | ko00361 | 2   |
| Metabolism         | D-Arginine and D-ornithine metabolism                      | ko00472 | 2   |
| Metabolism         | Lipoic acid metabolism                                     | ko00785 | 2   |
| Metabolism         | Other types of O-glycan biosynthesis                       | ko00514 | 2   |
| Metabolism         | Polyketide sugar unit biosynthesis                         | ko00523 | 2   |
| Metabolism         | Toluene degradation                                        | ko00623 | 2   |
| Metabolism         | Biosynthesis of siderophore group nonribosomal peptides    | ko01053 | 1   |
| Metabolism         | D-Alanine metabolism                                       | ko00473 | 1   |
| Metabolism         | Fluorobenzoate degradation                                 | ko00364 | 1   |
| Metabolism         | Glycosphingolipid biosynthesis - lacto and neolacto series | ko00601 | 1   |
| Metabolism         | Peptidoglycan biosynthesis                                 | ko00550 | 1   |
| Organismal Systems | T cell receptor signaling pathway                          | ko04660 | 239 |
| Organismal Systems | Th1 and Th2 cell differentiation                           | ko04658 | 203 |

---

|                                         |                                       |         |     |
|-----------------------------------------|---------------------------------------|---------|-----|
| Environmental<br>Information Processing | Phosphatidylinositol signaling system | ko04070 | 219 |
| Environmental<br>Information Processing | mTOR signaling pathway                | ko04150 | 34  |
| Genetic Information<br>Processing       | Aminoacyl-tRNA biosynthesis           | ko00970 | 63  |

---
