# Supplementary material for: Transcriptome landscape of Rafflesia cantleyi floral buds reveals insights into the roles of transcription factors and phytohormones in flower development
Source: PubMed Central journal article supplement (PMC6919626; doi:10.1371/journal.pone.0226338), 2019-12-18
Supplement: pone.0226338.s009.pdf [file pone.0226338.s009.pdf]

S5 Table. KEGG pathways enrichment analysis of DEGs

| <b>KEGG Pathway</b>                         | <b>Input number</b> | <b>Background number</b> | <b>P-value</b> | <b>Corrected P-value</b> |
|---------------------------------------------|---------------------|--------------------------|----------------|--------------------------|
| <b>FBS1-FBS2</b>                            |                     |                          |                |                          |
| Homologous recombination                    | 28                  | 56                       | 3.5E-09        | 1.6E-07                  |
| Arginine and proline metabolism             | 28                  | 76                       | 5.8E-07        | 1.5E-05                  |
| RNA degradation                             | 32                  | 104                      | 2.4E-06        | 5.2E-05                  |
| Alpha-linolenic acid metabolism             | 15                  | 31                       | 2.1E-05        | 3.0E-04                  |
| Other glycan degradation                    | 11                  | 18                       | 5.4E-05        | 6.9E-04                  |
| Nucleotide excision repair                  | 22                  | 69                       | 5.7E-05        | 7.2E-04                  |
| Lysine biosynthesis                         | 10                  | 16                       | 1.0E-04        | 1.2E-03                  |
| DNA replication                             | 17                  | 50                       | 0.000207       | 0.002181                 |
| C5-Branched dibasic acid metabolism         | 7                   | 10                       | 7.2E-04        | 6.5E-03                  |
| <b>FBS2-FBS3</b>                            |                     |                          |                |                          |
| RNA degradation                             | 52                  | 104                      | 5.44E-08       | 2.08E-06                 |
| Alanine, aspartate and glutamate metabolism | 33                  | 48                       | 7E-08          | 3E-06                    |
| Arginine and proline metabolism             | 37                  | 76                       | 7E-06          | 1E-04                    |
| Alpha-linolenic acid metabolism             | 22                  | 31                       | 8E-06          | 1E-04                    |
| Lysine biosynthesis                         | 12                  | 16                       | 6E-04          | 7E-03                    |
| Nicotinate and nicotinamide metabolism      | 11                  | 14                       | 8E-04          | 8E-03                    |
| Nitrogen metabolism                         | 20                  | 41                       | 8E-04          | 8E-03                    |
| Propanoate metabolism                       | 13                  | 22                       | 2E-03          | 2E-02                    |
| Nucleotide excision repair                  | 26                  | 69                       | 0.003097       | 0.023818                 |
| Diterpenoid biosynthesis                    | 11                  | 18                       | 3E-03          | 3E-02                    |
| Sulfur relay system                         | 9                   | 14                       | 0.006324       | 0.042863                 |
| Beta-alanine metabolism                     | 17                  | 41                       | 7E-03          | 5E-02                    |
| <b>FBS1-FBS3</b>                            |                     |                          |                |                          |
| Beta-alanine metabolism                     | 34                  | 41                       | 1.05E-07       | 2.46E-06                 |

---

|                                             |    |     |             |             |
|---------------------------------------------|----|-----|-------------|-------------|
| RNA degradation                             | 53 | 104 | 4.33E-06    | 7.30E-05    |
| Alanine, aspartate and glutamate metabolism | 32 | 48  | 6.96E-06    | 0.000109    |
| Arginine and proline metabolism             | 41 | 76  | 1.87E-05    | 0.00026     |
| Nicotinate and nicotinamide metabolism      | 14 | 14  | 0.000170853 | 0.001843096 |
| Alpha-linolenic acid                        | 20 | 31  | 0.000486    | 0.004557    |

---
